# Supplementary material for: Bioinformatics-based identification of RAS disequilibrium involved in post-hemorrhagic shock mesenteric lymph return-mediated acute kidney injury in mice
Source: PeerJ journal article supplement (doi:10.7717/peerj.20359), 2025-11-24
Supplement: Raw_data.xlsx [file Raw_data.xlsx]

## Sheet: figure3
Gray value of ACE	Sham	Shock	Shock+Ligation
	0.129073	0.248234	0.232205
	0.158528	0.277571	0.223858
	0.174059	0.261441	0.235861
Gray value of AT1R	Sham	Shock	Shock+Ligation
	0.269616	0.384206	0.309621
	0.260673	0.363101	0.301328
	0.26281	0.347382	0.341459
Gray value of ACE2	Sham	Shock	Shock+Ligation
	0.267916	0.127847	0.194327
	0.264946	0.126323	0.180824
	0.274261	0.120076	0.192407
Gray value of MasR	Sham	Shock	Shock+Ligation
	0.49392	0.29672	0.377239
	0.506373	0.31503	0.385051
	0.467316	0.34573	0.310048
Ang Ⅱ in kidney	Sham	Shock	Shock+Ligation
	46.5741	96	66.9755
	47.1247	76.8712	47.6547
	41.8795	84.5079	61.4775
	34.6609	96.2812	58.38
Ang（1-7）in kidney	Sham	Shock	Shock+Ligation
	9.95949	3.74608	5.33115
	8.38214	2.45216	4.67091
	7.51473	3.04074	5.78516
	8.31353	3.86253	5.29393
	8.85782
ACE/ACE2 ratio in kidney	Sham	Shock	Shock+Ligation
	0.481766	1.94165	1.19492
	0.598342	2.19731	1.23799
	0.634645	2.17729	1.22584
AT1R/MasR ratio in kidney	Sham	Shock	Shock+Ligation
	0.545871	1.29484	0.820757
	0.514785	1.15259	0.782567
	0.562382	1.00478	1.10131
AngⅡ/Ang(1-7) ratio in kidney	Sham	Shock	Shock+Ligation
	4.67635	25.6268	12.5631
	5.62204	31.3484	10.2024
	5.57298	27.7918	10.6268
	4.16922	24.9269	11.0277

## Sheet: figure4
Gray value of ACE	Shock	Shock+Enalaril	Shock+Ang(1-7)	Shock+Losartan
	0.248234	0.115712	0.170857	0.186359
	0.277571	0.123799	0.170259	0.166278
	0.261441	0.11744	0.186817	0.158384
Gray value of AT1R	Shock	Shock+Enalaril	Shock+Ang(1-7)	Shock+Losartan
	0.384206	0.29369	0.283177	0.253586
	0.363101	0.222985	0.244794	0.291824
	0.347382	0.187975	0.254352	0.278671
Ang Ⅱ in kidney	Shock	Shock+Enalaril	Shock+Ang(1-7)	Shock+Losartan
	96	74.6299	57.8194	56.7763
	76.8712	76.5565	66.8552	83.4709
	84.5079	71.1586	54.6393	85.0068
	96.2812	77.7019	79.4981	58.7342
		63.5449	79.7279

## Sheet: figure5
Gray value of ACE2	Shock	Shock+Enalaril	Shock+Ang(1-7)	Shock+Losartan
	0.127847	0.129552	0.175749	0.141256
	0.126323	0.153902	0.184104	0.140497
	0.120076	0.142329	0.172494	0.139907
Gray value of MasR	Shock	Shock+Enalaril	Shock+Ang(1-7)	Shock+Losartan
	0.29672	0.385225	0.356819	0.25163
	0.31503	0.314251	0.350579	0.262041
	0.34573	0.374694	0.315616	0.280765
Ang(1-7) in kidney	Shock	Shock+Enalaril	Shock+Ang(1-7)	Shock+Losartan
	3.74608	3.73437	5.05817	2.78116
	2.45216	3.99905	4.6326	2.99765
	3.04074	3.34721	4.72918	3.37117
	3.86253	3.35798	5.73654	3.40545
			5.57686

## Sheet: figure6
Gray value of ACE2	Shock+Ligation	Shock+Ligation+Ace2-/-	Shock+Ligation+AngⅡ	Shock+Ligation+A-779
	0.194327	0.0338205	0.185295	0.178561
	0.180824	0.0415692	0.201172	0.170583
	0.192407	0.0456633	0.205199	0.162943
Gray value of MasR	Shock+Ligation	Shock+Ligation+Ace2-/-	Shock+Ligation+AngⅡ	Shock+Ligation+A-779
	0.377239	0.328034	0.224456	0.314374
	0.385051	0.384256	0.262609	0.309474
	0.310048	0.328161	0.289873	0.305793
Ang(1-7) in kidney	Shock+Ligation	Shock+Ligation+Ace2-/-	Shock+Ligation+AngⅡ	Shock+Ligation+A-779
	5.33115	3.90471	4.03446	4.56754
	4.67091	2.39507	4.86954	4.88814
	5.78516	2.69219	4.44639	4.47457
	5.29393	2.48005	4.76522	4.36488
		3.18599		4.75394

## Sheet: figure7
Gray value of ACE	Shock+Ligation	Shock+Ligation+Ace2-/-	Shock+Ligation+AngⅡ	Shock+Ligation+A-779
	0.232205	0.14165	0.188806	0.224236
	0.223858	0.138358	0.13321	0.203328
	0.235861	0.158578	0.170554	0.213116
Gray value of AT1R	Shock+Ligation	Shock+Ligation+Ace2-/-	Shock+Ligation+AngⅡ	Shock+Ligation+A-779
	0.309621	0.311548	0.261393	0.255447
	0.301328	0.331809	0.267255	0.26494
	0.341459	0.2855	0.269414	0.219317
Ang Ⅱ in kidney	Shock+Ligation	Shock+Ligation+Ace2-/-	Shock+Ligation+AngⅡ	Shock+Ligation+A-779
	66.9755	63.6628	66.7065	74.0499
	47.6547	62.7152	84.6675	66.9545
	61.4775	68.0912	55.7436	63.8912
	58.38	55.3661	87.7444	71.6939
